# Supplementary material
Source: Springer Nature journal article supplement (https://www.springermedizin.de/resource/supplementary/13011_2010_140_MOESM1_ESM.pdf/9628482)
Supplement: MOESM1 [file 9628482]

327 studies retrieved and coded for eligibility

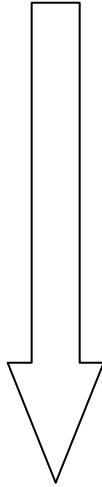

- 44 studies excluded because participants were not women who were pregnant or parenting
- 5 studies excluded because not all participants had a substance use problem at baseline
- 27 studies excluded because the program did not include a substance use treatment service addressing substance use specifically
- 16 studies excluded because the program did not include at least one treatment service related to children
- 6 studies excluded because the participants included men
- 6 studies excluded because the participants included women who were not pregnant or parenting
- 63 studies were excluded because the study design was not randomized, quasi-experimental, cohort, or cross-sectional (e.g. qualitative, case study)
- 40 studies were excluded because quantitative results for maternal well-being, parenting, or child well-being were not provided

120 studies met inclusion criteria for larger meta-analysis

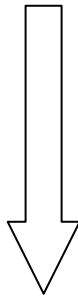

- 96 studies excluded because they did not provide quantitative data on substance use outcomes
- 3 studies excluded because they did not provide sufficient data to calculate effect sizes (e.g. standard deviations)

21 studies met inclusion criteria for substance use meta-analysis
